# Supplementary material for: Clonal Dispersal of Cryptococcus gattii VGII in an Endemic Region of Cryptococcosis in Colombia
Source: PubMed Central journal article supplement (PMC6616963; doi:10.3390/jof5020032), 2019-04-15
Supplement: jof-05-00032-s001.pdf [file jof-05-00032-s001.pdf]

Supplementary tables

**Table 1.** General information, mating type, allele types, and sequence types of additional *Cryptococcus gattii* molecular type VGII isolates included in the MLST analysis [9,22,23,32–34].

| Strain number | Other number | Country <sup>a</sup> | Source <sup>b</sup> | Mating type | CAP59 | GPD1 | IGS1 | LAC1 | PLB1 | SOD1 | URA5 | ST  |
|---------------|--------------|----------------------|---------------------|-------------|-------|------|------|------|------|------|------|-----|
| WM 178        | CBS 10082    | Aus                  | Clin                | alpha       | 1     | 17   | 16   | 16   | 14   | 19   | 7    | 21  |
| WM 04.72      | PWQ 314      | Aus                  | Clin                | alpha       | 3     | 2    | 6    | 7    | 1    | 18   | 5    | 33  |
| WM 08.309     | SOLIDAGO     | Aus                  | Vet                 | alpha       | 27    | 6    | 4    | 4    | 1    | 43   | 7    | 48  |
| WM 08.311     | Jackson      | Aus                  | Vet                 | alpha       | 3     | 16   | 15   | 4    | 9    | 23   | 2    | 5   |
| WM 09.94      | 1009         | Aus                  | Vet                 | a           | 14    | 21   | 27   | 28   | 27   | 46   | 2    | 38  |
| CBS11260      |              | Bra                  | Vet                 | alpha       | 68    | 6    | 82   | 4    | 16   | 94   | 6    | 248 |
| CDC-3225      |              | Bra                  | ND                  | alpha       | 21    | 6    | 25   | 4    | 2    | 27   | 7    | 264 |
| CDC-3234      |              | Bra                  | ND                  | alpha       | 33    | 6    | 25   | 29   | 1    | 1    | 1    | 137 |
| CDC-3243      |              | Bra                  | ND                  | alpha       | 2     | 6    | 16   | 4    | 16   | 4    | 2    | 283 |
| ICB180        |              | Bra                  | Env                 | alpha       | 10    | 6    | 16   | 4    | 16   | 20   | 2    | 185 |
| ICB184        |              | Bra                  | Env                 | alpha       | 14    | 6    | 15   | 4    | 2    | 15   | 2    | 124 |
| WM 04.84      | LA 337       | Bra                  | Clin                | alpha       | 5     | 30   | 25   | 4    | 16   | 14   | 6    | 34  |
| WM 05.419     | LMM 293      | Bra                  | Clin                | alpha       | 14    | 6    | 39   | 27   | 29   | 25   | 9    | 39  |
| WM 05.452     | LMM 417      | Bra                  | Clin                | alpha       | 2     | 27   | 15   | 4    | 1    | 8    | 7    | 16  |
| WM 05.456     | LMM 498      | Bra                  | Env                 | alpha       | 2     | 6    | 10   | 4    | 2    | 11   | 7    | 17  |
| WM 05.457     | LMM 504      | Bra                  | Clin                | a           | 2     | 27   | 31   | 4    | 1    | 8    | 7    | 19  |
| WM 05.461     | LMM 567      | Bra                  | Clin                | alpha       | 8     | 6    | 41   | 4    | 1    | 16   | 6    | 14  |
| WM 05.462     | LMM 574      | Bra                  | Clin                | alpha       | 8     | 6    | 36   | 4    | 1    | 16   | 6    | 15  |
| WM 05.525     | LMM 631      | Bra                  | Clin                | alpha       | 8     | 6    | 42   | 25   | 1    | 24   | 7    | 41  |
| WM 05.527     | LMM 634      | Bra                  | Clin                | alpha       | 34    | 6    | 9    | 4    | 16   | 9    | 2    | 28  |
| WM 05.528     | LMM 843      | Bra                  | Clin                | alpha       | 4     | 22   | 26   | 4    | 27   | 7    | 3    | 40  |

|           |                  |     |      |       |    |    |    |    |    |    |    |    |
|-----------|------------------|-----|------|-------|----|----|----|----|----|----|----|----|
| WM 05.529 | LMM 855          | Bra | Clin | alpha | 2  | 32 | 25 | 30 | 1  | 13 | 7  | 27 |
| WM 05.530 | LMM 860          | Bra | Clin | alpha | 1  | 1  | 31 | 21 | 27 | 7  | 4  | 13 |
| WM 05.533 | LMM 892          | Bra | Clin | alpha | 10 | 6  | 16 | 30 | 16 | 20 | 2  | 11 |
| WM 05.536 | LMM 638          | Bra | Clin | alpha | 2  | 6  | 4  | 4  | 16 | 4  | 2  | 9  |
| WM 05.545 | LMM 817          | Bra | Clin | alpha | 13 | 6  | 10 | 26 | 18 | 17 | 8  | 24 |
| WM 05.546 | LMM 818          | Bra | Clin | alpha | 13 | 6  | 25 | 26 | 18 | 17 | 8  | 23 |
| WM 05.547 | LMM 819          | Bra | Clin | alpha | 13 | 6  | 26 | 26 | 18 | 17 | 8  | 22 |
| WM 04.78  | H0058-I-762      | Col | Clin | alpha | 4  | 6  | 6  | 4  | 18 | 22 | 2  | 31 |
| WM 05.274 | H0058-I-1442     | Col | Clin | alpha | 12 | 29 | 6  | 21 | 22 | 21 | 2  | 29 |
| WM 05.339 | H0058-I-1648     | Col | Env  | alpha | 1  | 6  | 25 | 4  | 18 | 12 | 10 | 43 |
| WM 05.76  | AV54S; CBS 10089 | Gre | Clin | alpha | 8  | 16 | 35 | 4  | 2  | 3  | 7  | 35 |
| WM 05.77  | AV55; CBS 10090  | Gre | Clin | a     | 2  | 27 | 10 | 4  | 1  | 8  | 7  | 18 |
| WM 04.75  | MC-S-115         | Tha | Clin | alpha | 2  | 6  | 32 | 4  | 2  | 15 | 2  | 30 |
| WM 06.8   | LA 43; CBS 8684  | Uru | Env  | alpha | 7  | 6  | 32 | 21 | 25 | 2  | 2  | 3  |
| B7390     |                  | USA | Clin | alpha | 30 | 6  | 15 | 4  | 1  | 15 | 2  | 49 |
| B7432     |                  | USA | Clin | ND    | 4  | 6  | 15 | 4  | 1  | 15 | 2  | 6  |
| B8973     | 2010721506       | USA | Clin | alpha | 2  | 25 | 4  | 21 | 9  | 8  | 7  | 50 |
| WM 1851   | LA 387           | Ven | Clin | alpha | 22 | 21 | 40 | 4  | 14 | 26 | 2  | 45 |
| WM 06.12  | LA 381           | Ven | Clin | alpha | 2  | 6  | 31 | 4  | 18 | 12 | 10 | 37 |

<sup>a</sup> Isolates recovered in Aus: Australia, Bra: Brazil, Col: Colombia, Gre: Greece, Tha: Thailand, Uru: Uruguay, USA: United States of America, and Ven: Venezuela.; <sup>b</sup> Clin: Clinical; Env: Environmental; Vet: Veterinary.; ND: No determined.

**Table 2.** Organ burden of mice infected with *Cryptococcus gattii* isolates molecular type VGII.

| Strain         | Organ burden (log 10 CFU/g) |             |             |
|----------------|-----------------------------|-------------|-------------|
|                | Brain                       | Lung        | Spleen      |
| ENV152 (VGIIa) | 6.75 ± 1.09                 | 5.56 ± 0.65 | 3.97 ± 2.20 |
| H0058-I-1511   | 7.69 ± 0.45                 | 6.88 ± 0.52 | 4.78 ± 2.57 |
| H0058-I-2792   | 7.37 ± 0.48                 | 7.24 ± 0.33 | 5.20 ± 0.68 |
| RB28 (VGIIb)   | 7.26 ± 0.36                 | 6.98 ± 0.49 | 5.69 ± 1.04 |
| H0058-I-357    | 8.69 ± 0.68                 | 7.47 ± 3.23 | 6.41 ± 1.23 |
| H0058-I-3030   | 8.03 ± 4.27                 | 6.88 ± 3.76 | 3.18 ± 1.55 |
| Control WM 198 | 7.49 ± 0.77                 | 7.03 ± 0.39 | 4.84 ± 0.80 |
| Saline         | 0                           | 0           | 0           |
